# Supplementary material
Source: PubMed Central journal article supplement (PMC6103480)
Supplement: NIHMS983296-supplement-Supp_appendix.pdf [file NIHMS983296-supplement-Supp_appendix.pdf]

Supplementary Appendix 1- Detailed diagnosis codes for study inclusion/exclusion

|                  | <b>ICD9 Code</b> | <b>Diagnosis</b>                                      |
|------------------|------------------|-------------------------------------------------------|
| <b>Inclusion</b> | 592.0            | Calculus of kidney                                    |
|                  | 592.1            | Calculus of ureter                                    |
| <b>Exclusion</b> | 596.51           | Hypertonicity of bladder                              |
|                  | 596.52           | Low bladder compliance                                |
|                  | 596.53           | Paralysis of bladder                                  |
|                  | 596.54           | Neurogenic bladder NOS                                |
|                  | 596.55           | Detrusor sphincter dyssynergia                        |
|                  | 596.59           | Other functional disorder of bladder                  |
|                  | 741.0            | Spina bifida with hydrocephalus                       |
|                  | 741.00           | Spina bifida unspecified region with hydrocephalus    |
|                  | 741.9            | Spina bifida without mention of hydrocephalus         |
|                  | 741.90           | Spina bifida unspecified region without hydrocephalus |
|                  | 756.17           | Spina bifida occulta                                  |
|                  | 344.61           | Cauda equina syndrome with neurogenic bladder         |
|                  | 752.62           | Epispadias                                            |
|                  | 753.22           | Congenital obstruction of ureterovesical junction     |
|                  | 753.23           | Congenital ureterocele                                |
|                  | 753.5            | Exstrophy of urinary bladder                          |
|                  | 753.6            | Atresia and stenosis of urethra and bladder neck      |
|                  | 756.71           | Prune belly syndrome                                  |
|                  | V420             | Kidney transplant                                     |

Supplementary Appendix 2- Stone-related procedure codes for study inclusion

| <b>Procedure</b> | <b>ICD9 Code</b> | <b>CPT Code(s)</b>            |
|------------------|------------------|-------------------------------|
| SWL              | 98.51            | 50590                         |
| URS              | 56.31            | 52325<br>52344-46<br>52351-55 |
| Stent            | 59.8             | 52332                         |
