# Supplementary material
Source: PubMed Central journal article supplement (PMC6103480)
Supplement: NIHMS983296-supplement-supp_table.pdf [file NIHMS983296-supplement-supp_table.pdf]

**Supplementary Table- Patient and hospital characteristics by procedure type**

|                                   | SWL<br>(N=1087) | URS<br>(N=1194) | Total<br>(N=2281) | p value              |
|-----------------------------------|-----------------|-----------------|-------------------|----------------------|
| <b>Age in years at admission</b>  |                 |                 |                   | 0.0010 <sup>1</sup>  |
| Median                            | 17.0            | 17.0            | 17.0              |                      |
| Q1, Q3                            | 13.0, 17.0      | 14.0, 18.0      | 14.0, 17.0        |                      |
| <b>Patient Age, By Category</b>   |                 |                 |                   | 0.0034 <sup>2</sup>  |
| 0-1 years- infants                | 8 (0.7%)        | 5 (0.4%)        | 13 (0.6%)         |                      |
| 1-3 years- toddlers               | 13 (1.2%)       | 6 (0.5%)        | 19 (0.8%)         |                      |
| 3-6 years- preschool              | 32 (2.9%)       | 24 (2.0%)       | 56 (2.5%)         |                      |
| 6-12 years- schoolage             | 211 (19.4%)     | 179 (15.0%)     | 390 (17.1%)       |                      |
| 12-18 years-teens                 | 823 (75.7%)     | 980 (82.1%)     | 1803 (79.0%)      |                      |
| <b>Gender</b>                     |                 |                 |                   | 0.0001 <sup>2</sup>  |
| Male                              | 412 (37.9%)     | 374 (31.3%)     | 786 (34.5%)       |                      |
| Female                            | 595 (54.7%)     | 757 (63.4%)     | 1352 (59.3%)      |                      |
| <b>Race</b>                       |                 |                 |                   | 0.1314 <sup>2</sup>  |
| White                             | 515 (47.4%)     | 621 (52.0%)     | 1136 (49.8%)      |                      |
| Black                             | 30 (2.8%)       | 33 (2.8%)       | 63 (2.8%)         |                      |
| Other                             | 156 (14.4%)     | 167 (14.0%)     | 323 (14.2%)       |                      |
| <b>Insurance</b>                  |                 |                 |                   | 0.0005 <sup>2</sup>  |
| A                                 | 3 (0.3%)        | 1 (0.1%)        | 4 (0.2%)          |                      |
| Public                            | 314 (28.9%)     | 292 (24.5%)     | 606 (26.6%)       |                      |
| Private                           | 676 (62.2%)     | 834 (69.8%)     | 1510 (66.2%)      |                      |
| Other                             | 91 (8.4%)       | 67 (5.6%)       | 158 (6.9%)        |                      |
| <b>Treatment Year</b>             |                 |                 |                   | 0.0003 <sup>4</sup>  |
| 2007                              | 239 (22.0%)     | 188 (15.7%)     | 427 (18.7%)       |                      |
| 2008                              | 303 (27.9%)     | 313 (26.2%)     | 616 (27.0%)       |                      |
| 2009                              | 300 (27.6%)     | 378 (31.7%)     | 678 (29.7%)       |                      |
| 2010                              | 245 (22.5%)     | 315 (26.4%)     | 560 (24.6%)       |                      |
| <b>Location of Stone</b>          |                 |                 |                   |                      |
| renal                             | 764 (70.3%)     | 347 (29.1%)     | 1111 (48.7%)      | <0.0001 <sup>2</sup> |
| ureteral                          | 378 (34.8%)     | 967 (81.0%)     | 1345 (59.0%)      | <0.0001 <sup>2</sup> |
| <b>Income</b>                     |                 |                 |                   | 0.0224 <sup>2</sup>  |
| First quartile                    | 260 (23.9%)     | 272 (22.8%)     | 532 (23.3%)       |                      |
| Second quartile                   | 313 (28.8%)     | 296 (24.8%)     | 609 (26.7%)       |                      |
| Third quartile                    | 271 (24.9%)     | 290 (24.3%)     | 561 (24.6%)       |                      |
| Fourth quartile                   | 228 (21.0%)     | 317 (26.5%)     | 545 (23.9%)       |                      |
| <b>Charlson Comorbidity score</b> |                 |                 |                   | 0.2125 <sup>3</sup>  |
| 0                                 | 1001 (92.1%)    | 1074 (89.9%)    | 2075 (91.0%)      |                      |
| 1                                 | 61 (5.6%)       | 93 (7.8%)       | 154 (6.8%)        |                      |
| 2                                 | 22 (2.0%)       | 23 (1.9%)       | 45 (2.0%)         |                      |
| 3                                 | 3 (0.3%)        | 4 (0.3%)        | 7 (0.3%)          |                      |

---

**Supplementary Table- Patient and hospital characteristics by procedure type**

|                       | SWL<br>(N=1087) | URS<br>(N=1194) | Total<br>(N=2281) | p value             |
|-----------------------|-----------------|-----------------|-------------------|---------------------|
| <b>Hospital State</b> |                 |                 |                   | 0.0001 <sup>2</sup> |
| CA                    | 282 (25.9%)     | 245 (20.5%)     | 527 (23.1%)       |                     |
| FL                    | 389 (35.8%)     | 403 (33.8%)     | 792 (34.7%)       |                     |
| NC                    | 185 (17.0%)     | 195 (16.3%)     | 380 (16.7%)       |                     |
| NY                    | 181 (16.7%)     | 281 (23.5%)     | 462 (20.3%)       |                     |
| UT                    | 50 (4.6%)       | 70 (5.9%)       | 120 (5.3%)        |                     |

<sup>1</sup>Kruskal Wallis <sup>2</sup>Chi-Square <sup>3</sup>Fisher Exact

<sup>4</sup>Unadjusted Logistic regression for modeling probability of URS with year as categorical

---
